# Supplementary material for: Integrated Analysis Identifies Interaction Patterns between Small Molecules and Pathways
Source: Hindawi journal article supplement (doi:10.1155/2014/931825), 2014-07-13
Supplement: f1 [file 931825.f1.pdf]

## Supplementary materials:

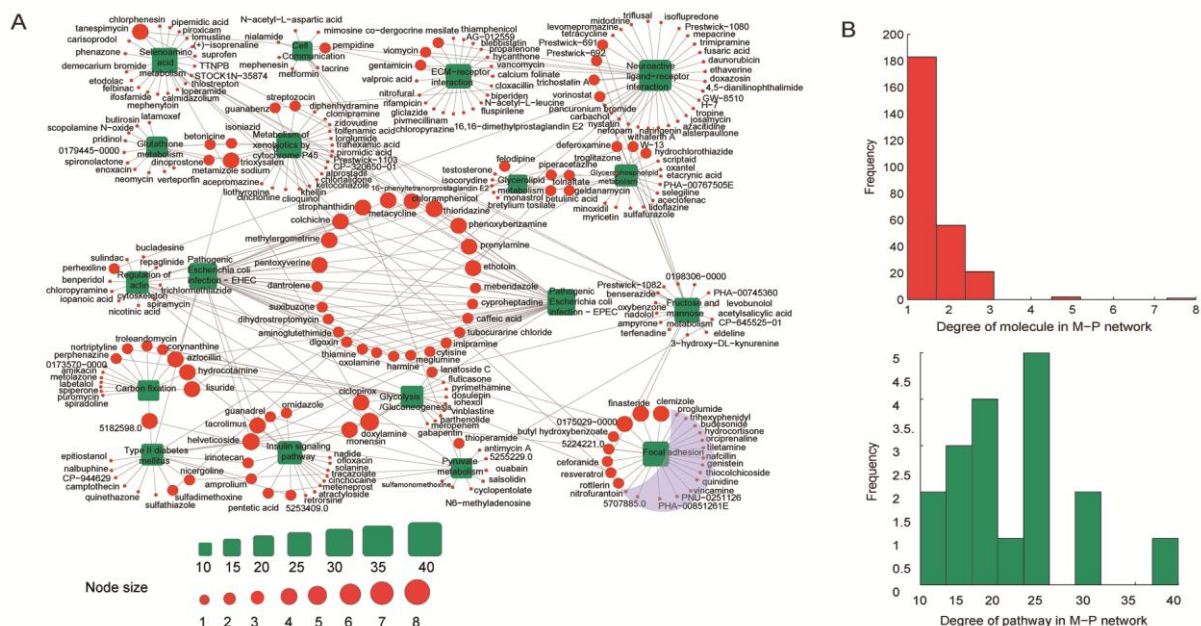

FIGURE S1: Visualisation of the M-P link map for liver cancer and its degree distribution. (A) The red circles and green rectangles correspond to the small molecules and metabolic pathways, respectively. Node size is proportional to the degree of the node. (B) The degree distribution of small molecules and pathways.

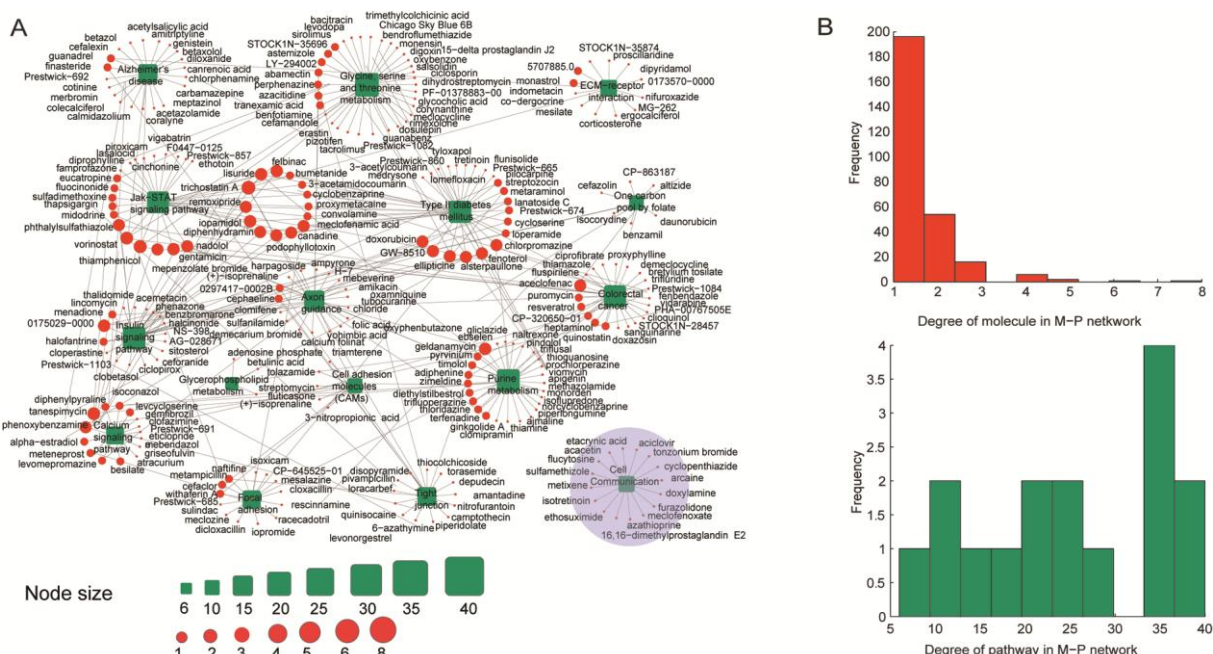

FIGURE S2: Visualisation of the M-P link map for lung cancer and its degree distribution. (A) The red circles and green rectangles correspond to the small molecules and metabolic pathways, respectively. Node size is proportional to the degree of the node. (B) The degree distribution of small molecules and pathways.

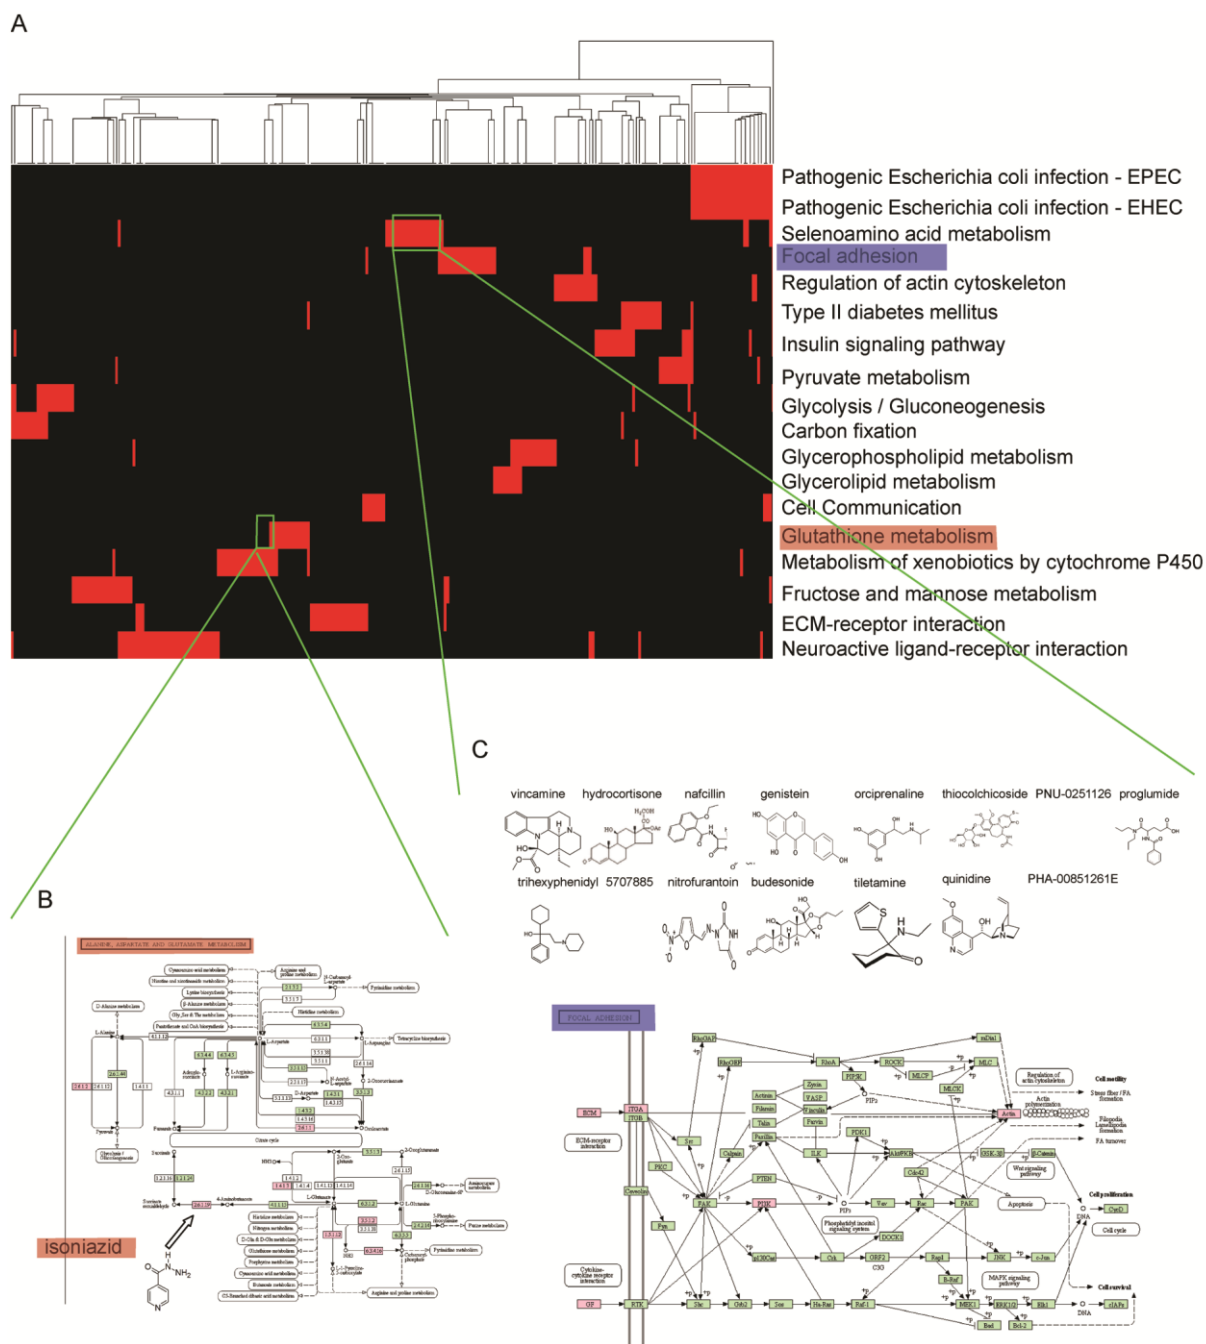

FIGURE S3. Hierarchical clustering in the M-P link map for liver cancer from GSE5364. (A) Hierarchical clustering between 263 small molecules and 18 pathways. The corresponding cells are coloured red where small molecules link to the pathways in the M-P link map. The labels for the corresponding pathways are shown on the right of the figure. (B) Zoomed-in plot of an sM-sP link between isoniazid and the glutathione metabolism pathway. The gene indicated by the arrow is the drug target of isoniazid. Differentially expressed genes in this pathway are coloured pink, while other genes in green are human disease-related genes. (C) Zoomed-in plot of mM-sP links between 15 small molecules and the focal

---

adhesion. These 15 small molecules target only the focal adhesion pathway. Their structures are given. The differentially expressed genes in this pathway are coloured pink, while other genes in green are human disease-related genes.

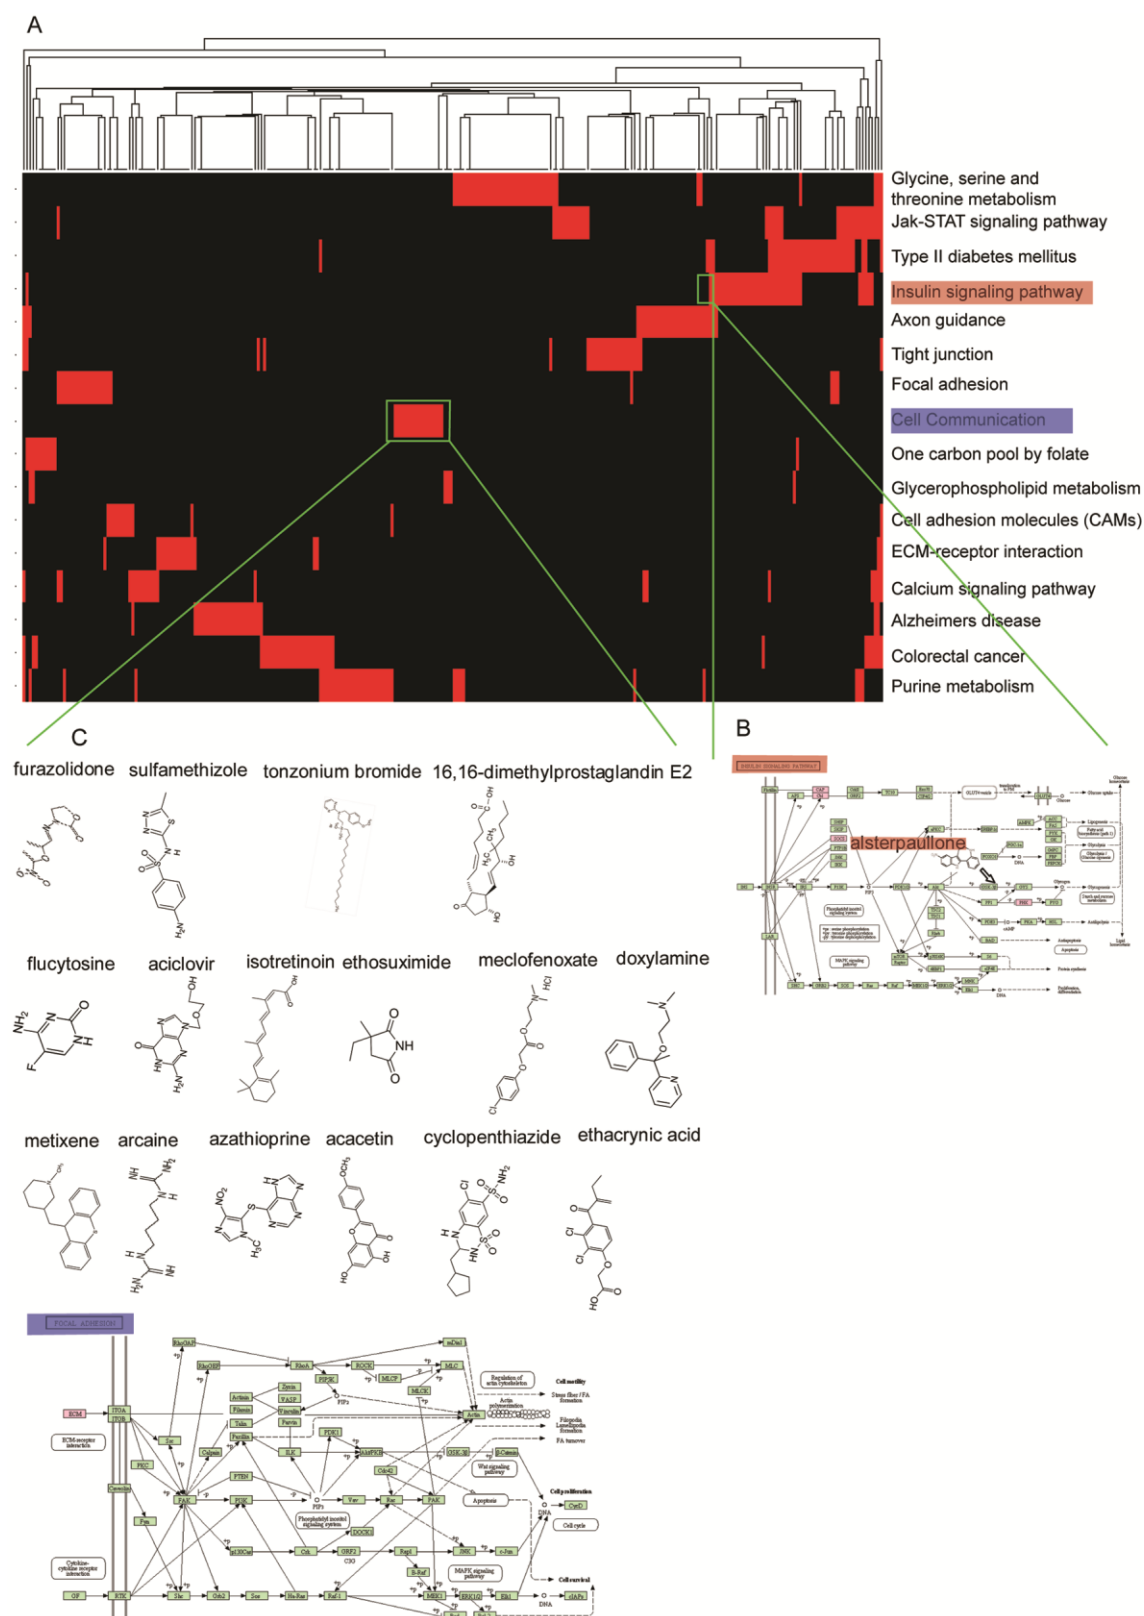

FIGURE S4: Hierarchical clustering in the M-P link map for lung cancer from GSE5364. (A) Hierarchical clustering between 276 small molecules and 16 pathways. The corresponding cells are coloured red where small molecules link to the pathways in the M-P link map. The labels for the corresponding pathways are shown on the right of the figure. (B) Zoomed-in plot of an sM-sP link between alsterpaulone and the

insulin signaling pathway. The gene indicated by the arrow is the drug target of alsterpaullone. Differentially expressed genes in this pathway are coloured pink, while other genes in green are human disease-related genes. (C) Zoomed-in plot of mM-sP links between 16 small molecules and the Cell Communication. Their structures are given. The differentially expressed genes in this pathway are coloured pink, while other genes in green are human disease-related genes.

TABLE S1: The characteristics of molecules with the sM-mP pattern in liver cancer

| Small molecule | Degree in M-P link map | Description of the small molecule               |
|----------------|------------------------|-------------------------------------------------|
| doxylamine     | 8                      | used s an antitussive, antiemetic, and hypnotic |
| helveticoside  | 5                      | unknown                                         |
| thioridazine   | 5                      | a phenothiazine antipsychotic agent             |

TABLE S2: The characteristics of molecules with the sM-mP pattern in lung cancer

| Small molecule | Degree in M-P link map | Description of the small molecule  |
|----------------|------------------------|------------------------------------|
| trichostatin A | 8                      | serves as an antifungal antibiotic |
| vorinostat     | 6                      | as histone deacetylase inhibitors  |
| thiamphenicol  | 5                      | an antibiotic                      |
| tanespimycin   | 5                      | treatment of cancer                |

| direct evidence f | mM_GrugE | mM_name         | mM_Description                                           | target_GeneSym |
|-------------------|----------|-----------------|----------------------------------------------------------|----------------|
|                   | DB00227  | Lovastatin      | Lovastatin is a cholesterol-lowering agent               | ITGAL          |
|                   | DB00877  | Sirolimus       | Sirolimus is a potent immunosuppressant                  | MTOR           |
|                   | DB01118  | Amiodarone      | It increases the duration of ventricular repolarization  | ADRB1          |
|                   | DB01235  | L-DOPA          | It is used for the treatment of parkinsonism             | DRD1           |
|                   | DB01235  | L-DOPA          | It is used for the treatment of parkinsonism             | DRD2           |
|                   | DB00589  | Lisuride        | An ergot derivative that acts as an agonist              | HTR2A          |
|                   | DB00589  | Lisuride        | An ergot derivative that acts as an agonist              | HTR2B          |
|                   | DB00589  | Lisuride        | An ergot derivative that acts as an agonist              | HTR2C          |
|                   | DB04820  | Nialamide       | Withdrawn from the Canadian, US, and UK markets          | MAOA           |
|                   | DB04820  | Nialamide       | Withdrawn from the Canadian, US, and UK markets          | MAOB           |
|                   | DB01041  | Thalidomide     | Thalidomide displays immunosuppressive activity          | TNF            |
| marker/mechanism  | DB01645  | Genistein       | It is used as an antineoplastic and antiangiogenic agent | PTK2B          |
|                   | DB08814  | Triflusal       | Triflusal appears to be equally effective as aspirin     | NFKB1          |
|                   | DB00877  | Sirolimus       | Sirolimus is a potent immunosuppressant                  | MTOR           |
|                   | DB00811  | Ribavirin       | A nucleoside antimetabolite antiviral agent              | ADK            |
|                   | DB00811  | Ribavirin       | A nucleoside antimetabolite antiviral agent              | ENPP1          |
|                   | DB00811  | Ribavirin       | A nucleoside antimetabolite antiviral agent              | IMPDH1         |
|                   | DB00811  | Ribavirin       | A nucleoside antimetabolite antiviral agent              | NT5C2          |
|                   | DB01037  | Selegiline      | It is used in newly diagnosed patients with parkinsonism | MAOA           |
|                   | DB01037  | Selegiline      | It is used in newly diagnosed patients with parkinsonism | MAOB           |
|                   | DB04841  | Flunarizine     | It is effective in the prophylaxis of migraine           | CACNA1G        |
|                   | DB02375  | Myricetin       | Not Available                                            | PIK3CG         |
|                   | DB01055  | Mimosine        | An antineoplastic alanine-substituted phenol             | TYR            |
|                   | DB03585  | Oxyphenbutazone | Oxyphenbutazone was withdrawn from the market            | PLA2G2E        |

| KEGG_pathway                             | Pathway_Description                                |
|------------------------------------------|----------------------------------------------------|
| Leukocyte transendothelial migration     | Leukocyte migration from the blood into tissue     |
| Adipocytokine signaling pathway          | Increased adipocyte volume and number are p        |
| Gap junction                             | Gap junctions contain intercellular channels th    |
| Gap junction                             | Gap junctions contain intercellular channels th    |
| Gap junction                             | Gap junctions contain intercellular channels th    |
| Gap junction                             | Gap junctions contain intercellular channels th    |
| Gap junction                             | Gap junctions contain intercellular channels th    |
| Gap junction                             | Gap junctions contain intercellular channels th    |
| Glycine, serine and threonine metabolism | Serine is derived from 3-phospho-D-glycerate,      |
| Glycine, serine and threonine metabolism | Serine is derived from 3-phospho-D-glycerate,      |
| Hematopoietic cell lineage               | Blood-cell development progresses from a her       |
| Leukocyte transendothelial migration     | Leukocyte migration from the blood into tissue     |
| MAPK signaling pathway                   | The mitogen-activated protein kinase (MAPK) i      |
| mTOR signaling pathway                   |                                                    |
| Purine metabolism                        |                                                    |
| Purine metabolism                        |                                                    |
| Purine metabolism                        |                                                    |
| Purine metabolism                        |                                                    |
| Tryptophan metabolism                    |                                                    |
| Tryptophan metabolism                    |                                                    |
| Type II diabetes mellitus                | "Diabetogenic" factors including FFA, TNF $\alpha$ |
| Type II diabetes mellitus                | "Diabetogenic" factors including FFA, TNF $\alpha$ |
| Tyrosine metabolism                      |                                                    |
| VEGF signaling pathway                   | There is now much evidence that VEGFR-2 is tl      |

[illegible]



as bind to endothelial cell adhesion molecules (CAM) and then migrate across the vascular endothelium.

channel is formed by docking of two 'hemichannels', each containing six connexins, contributed by each  
channel is formed by docking of two 'hemichannels', each containing six connexins, contributed by each  
channel is formed by docking of two 'hemichannels', each containing six connexins, contributed by each  
channel is formed by docking of two 'hemichannels', each containing six connexins, contributed by each  
channel is formed by docking of two 'hemichannels', each containing six connexins, contributed by each  
high animals cannot synthesize. In bacteria and plants, threonine is derived from aspartate.

high animals cannot synthesize. In bacteria and plants, threonine is derived from aspartate.

committed progenitor cell: a common lymphoid progenitor (CLP) or a common myeloid progenitor (CMP)

as bind to endothelial cell adhesion molecules (CAM) and then migrate across the vascular endothelium.

tion, differentiation and migration.

phorylation, interaction with SOCS, regulation of the expression, modification of the cellular localization

phorylation, interaction with SOCS, regulation of the expression, modification of the cellular localization

I transducer in both physiologic and pathologic angiogenesis.

1 neighboring cell. These channels permit the direct transfer of small molecules including ions, amino acids, and neurotransmitters.  
1 neighboring cell. These channels permit the direct transfer of small molecules including ions, amino acids, and neurotransmitters.  
1 neighboring cell. These channels permit the direct transfer of small molecules including ions, amino acids, and neurotransmitters.  
1 neighboring cell. These channels permit the direct transfer of small molecules including ions, amino acids, and neurotransmitters.  
1 neighboring cell. These channels permit the direct transfer of small molecules including ions, amino acids, and neurotransmitters.  
1 neighboring cell. These channels permit the direct transfer of small molecules including ions, amino acids, and neurotransmitters.

P).

, and degradation represent the molecular mechanisms stimulated by them.  
, and degradation represent the molecular mechanisms stimulated by them.

ids, nucleotides, second messengers and other metabolites between adjacent cells.

ids, nucleotides, second messengers and other metabolites between adjacent cells.

ids, nucleotides, second messengers and other metabolites between adjacent cells.

ids, nucleotides, second messengers and other metabolites between adjacent cells.

ids, nucleotides, second messengers and other metabolites between adjacent cells.

ids, nucleotides, second messengers and other metabolites between adjacent cells.
